# Supplementary material for: Mechanistic kinetic modeling for catalytic conversion of DME to gasoline-range hydrocarbons over nanostructured ZSM-5
Source: Royal Society of Chemistry journal article supplement (doi:10.1039/d2cy00616b), 2022-01-01
Supplement: d2cy00616b1.pdf [file d2cy00616b1.pdf]

## Supplementary Information

### **Mechanistic Kinetic Modeling for Catalytic Conversion of DME to Gasoline-range Hydrocarbons over Nanostructured ZSM-5**

Damin Lee<sup>a,1</sup>, Jong Jin Kim<sup>b,1</sup>, Mansoor Ali<sup>b</sup>, Jin Woo Choung<sup>c</sup>, Won Bo Lee<sup>a,\*</sup>, Jong Wook Bae<sup>b,\*</sup>, Myung-June Park<sup>d,e,\*</sup>

<sup>a</sup> School of Chemical & Biological Engineering, Seoul National University, Seoul 08826, Republic of Korea

<sup>b</sup> School of Chemical Engineering, Sungkyunkwan University (SKKU), Suwon, Gyeonggi-do, 16419, Republic of Korea

<sup>c</sup> Hyundai Motor Company, Uiwang, Gyeonggi-do 16082, Republic of Korea

<sup>d</sup> Department of Energy Systems Research, Ajou University, Suwon 16499, Republic of Korea

<sup>e</sup> Department of Chemical Engineering, Ajou University, Suwon 16499, Republic of Korea

<sup>1</sup> D. Lee and J.J. Kim equally contributed to this work.

\*Corresponding authors: wblee@snu.ac.kr (W. B. Lee), finejw@skku.edu (J. W. Bae), mjpark@ajou.ac.kr (M.-J. Park)

**Table S1.** Experimental conditions for DTH reaction on the nano-structured ZSM-5

| Run | T<br>[K] | P <sub>total</sub><br>[bar] | GHSV<br>[L/(kg <sub>cat</sub> ·h)] | DME/N <sub>2</sub><br>[Molar ratio%] |
|-----|----------|-----------------------------|------------------------------------|--------------------------------------|
| 1   | 573      | 1                           | 4400                               | 5/95                                 |
| 2   | 553      | 1                           | 4400                               | 5/95                                 |
| 3   | 533      | 1                           | 4400                               | 5/95                                 |
| 4   | 523      | 1                           | 4400                               | 5/95                                 |
| 5   | 513      | 1                           | 4400                               | 5/95                                 |
| 6   | 573      | 3                           | 4400                               | 5/95                                 |
| 7   | 553      | 3                           | 4400                               | 5/95                                 |
| 8   | 533      | 3                           | 4400                               | 5/95                                 |
| 9   | 523      | 3                           | 4400                               | 5/95                                 |
| 10  | 513      | 3                           | 4400                               | 5/95                                 |
| 11  | 573      | 5                           | 4400                               | 5/95                                 |
| 12  | 553      | 5                           | 4400                               | 5/95                                 |
| 13  | 533      | 5                           | 4400                               | 5/95                                 |
| 14  | 523      | 5                           | 4400                               | 5/95                                 |
| 15  | 513      | 5                           | 4400                               | 5/95                                 |
| 16  | 533      | 1                           | 2200                               | 5/95                                 |
| 17  | 533      | 1                           | 8800                               | 5/95                                 |
| 18  | 533      | 1                           | 10000                              | 5/95                                 |

**Table S2.** Textural and surface properties of nano-structured ZSM-5 zeolite

| XRF <sup>a</sup> | N <sub>2</sub> sorption <sup>b</sup> |                |                | XRD <sup>c</sup> | NH <sub>3</sub> -TPD <sup>d</sup> |                |                | Py-IR <sup>e</sup> | dTBPpy-IR <sup>f</sup> |
|------------------|--------------------------------------|----------------|----------------|------------------|-----------------------------------|----------------|----------------|--------------------|------------------------|
|                  | Si/Al                                | S <sub>g</sub> | P <sub>V</sub> | P <sub>D</sub>   | d <sub>p</sub>                    | S <sub>W</sub> | S <sub>S</sub> | S <sub>T</sub>     | B/L                    |
| 72               | 373                                  | 0.27           | 3.9            | 35               | 0.19                              | 0.27           | 0.46           | 22.1               | 0.05                   |

<sup>a</sup> Si/Al molar ratio on the fresh nano-structured ZSM-5 was determined by XRF analysis.

<sup>b</sup> S<sub>g</sub> (surface area, m<sup>2</sup>/g), P<sub>V</sub> (pore volume, cm<sup>3</sup>/g) and P<sub>D</sub> (average pore diameter, nm) were determined by N<sub>2</sub>-sorption analysis with the help of BET equation.

<sup>c</sup> Average crystallite size of ZSM-5 were measured by Scherrer equation from the most intense XRD peak at  $2\theta = 7 - 9^\circ$ .

<sup>d</sup> Quantities of weak (S<sub>W</sub>, mmol/g) and strong (S<sub>S</sub>, mmol/g) acid sites as well as total acid sites (S<sub>T</sub>, mmol/g) were determined by the integrated areas of NH<sub>3</sub>-TPD peaks located at 393 – 523 and 523 – 823 K, respectively.

<sup>e</sup> Quantities of Brønsted (B) and Lewis (L) acid sites and ratio of B/L were calculated from the Py-IR spectra obtained at a desorption temperature of 523 K.

<sup>f</sup> Accessibility factor (AF) corresponding to the percentage of outer surface acidic sites (external acidic sites) were calculated by the adsorption sites for 2,6-di-tert-butylpyridine (dTBPpy) divided by total amount of acid sites measured by Py-IR analysis.

**Table S3.** Detailed products distributions and DME conversions at 18 different reaction conditions such as temperatures, space velocities, and pressures

| T [K] | SV [L/kg <sub>cat</sub> /h] | P [bar] | DME Conv. (mol%) | Mole fractions of effluent gases (%) <sup>a</sup> |     |      |      |      |      |      |         |      |         |     |               |       |     |     |     |     |      |                   |
|-------|-----------------------------|---------|------------------|---------------------------------------------------|-----|------|------|------|------|------|---------|------|---------|-----|---------------|-------|-----|-----|-----|-----|------|-------------------|
|       |                             |         |                  | C1                                                | C2  | C3   | C4   | C5   | MTBE | C6   | Benzene | C7   | Toluene | C8  | Ethyl benzene | m,p-X | o-X | C9  | EMB | TMB | etc  | Carbon balance(%) |
| 573   | 4400                        | 1       | 100.0            | 0.1                                               | 3.3 | 18.7 | 14.7 | 12.3 | 2.9  | 12.9 | 0.9     | 8.5  | 1.0     | 4.4 | 0.2           | 2.7   | 1.0 | 3.0 | 6.6 | 1.1 | 5.7  | 102.4             |
| 553   | 4400                        | 1       | 100.0            | 0.1                                               | 4.5 | 14.7 | 11.9 | 11.1 | 2.8  | 14.3 | 0.6     | 11.0 | 0.5     | 7.3 | 0.1           | 2.5   | 1.2 | 2.7 | 6.9 | 0.9 | 7.1  | 100.6             |
| 533   | 4400                        | 1       | 57.8             | 0.1                                               | 5.4 | 29.9 | 10.5 | 6.1  | 1.3  | 10.3 | 0.5     | 9.6  | 0.3     | 6.8 | 0.0           | 2.1   | 0.9 | 2.2 | 6.5 | 1.1 | 6.2  | 102.2             |
| 523   | 4400                        | 1       | 44.6             | 0.3                                               | 7.1 | 31.4 | 10.0 | 5.9  | 0.7  | 9.1  | 0.2     | 9.2  | 1.6     | 3.7 | 0.0           | 1.7   | 1.2 | 0.8 | 7.2 | 1.0 | 9.0  | 101.1             |
| 513   | 4400                        | 1       | 28.8             | 0.3                                               | 5.8 | 36.1 | 11.8 | 5.0  | 0.8  | 8.0  | 0.3     | 8.5  | 1.7     | 3.3 | 0.1           | 1.6   | 1.1 | 0.8 | 6.4 | 0.9 | 7.4  | 98.2              |
| 573   | 4400                        | 3       | 100.0            | 0.2                                               | 1.9 | 17.1 | 8.3  | 14.4 | 1.2  | 14.3 | 1.0     | 8.7  | 1.1     | 4.3 | 0.2           | 3.0   | 1.1 | 3.1 | 7.8 | 1.1 | 11.3 | 97.8              |
| 553   | 4400                        | 3       | 100.0            | 0.3                                               | 3.7 | 12.1 | 6.9  | 12.6 | 1.3  | 15.8 | 0.6     | 11.9 | 0.5     | 6.8 | 0.1           | 2.3   | 1.2 | 2.7 | 7.5 | 0.9 | 12.8 | 102.2             |
| 533   | 4400                        | 3       | 62.0             | 0.4                                               | 8.5 | 22.2 | 6.1  | 7.5  | 0.5  | 10.9 | 0.3     | 9.9  | 0.3     | 6.7 | 0.0           | 2.1   | 1.0 | 2.2 | 8.5 | 1.0 | 12.0 | 104.1             |
| 523   | 4400                        | 3       | 46.0             | 0.6                                               | 9.2 | 27.0 | 7.9  | 6.7  | 0.2  | 8.8  | 0.2     | 8.3  | 1.5     | 3.5 | 0.0           | 1.7   | 1.2 | 1.0 | 8.2 | 1.3 | 12.8 | 100.9             |
| 513   | 4400                        | 3       | 20.0             | 0.6                                               | 6.3 | 38.8 | 11.3 | 3.7  | 0.4  | 4.7  | 0.5     | 5.4  | 0.2     | 4.3 | 0.0           | 1.6   | 0.7 | 2.1 | 6.9 | 1.0 | 11.1 | 102.4             |
| 573   | 4400                        | 5       | 100.0            | 0.2                                               | 1.2 | 16.9 | 7.4  | 14.8 | 0.8  | 14.9 | 0.9     | 9.4  | 1.5     | 4.3 | 0.3           | 3.2   | 1.2 | 3.5 | 7.1 | 1.4 | 11.0 | 97.7              |
| 553   | 4400                        | 5       | 100.0            | 0.3                                               | 3.0 | 12.2 | 6.2  | 13.5 | 1.0  | 16.2 | 0.6     | 12.1 | 0.6     | 6.9 | 0.1           | 2.3   | 1.0 | 2.8 | 7.4 | 0.9 | 13.0 | 100.7             |
| 533   | 4400                        | 5       | 64.5             | 0.4                                               | 8.1 | 19.2 | 6.0  | 7.2  | 0.4  | 9.7  | 0.4     | 8.8  | 0.3     | 6.0 | 0.0           | 2.0   | 1.0 | 2.4 | 8.7 | 1.2 | 18.1 | 105.1             |
| 523   | 4400                        | 5       | 52.9             | 0.6                                               | 9.6 | 25.7 | 7.5  | 7.2  | 0.3  | 9.0  | 0.2     | 8.4  | 1.5     | 3.5 | 0.0           | 1.7   | 1.1 | 1.0 | 8.2 | 1.3 | 13.2 | 103.1             |
| 513   | 4400                        | 5       | 20.9             | 0.7                                               | 6.4 | 35.8 | 10.9 | 3.7  | 0.5  | 4.2  | 0.4     | 4.5  | 0.2     | 3.5 | 0.0           | 1.5   | 0.6 | 1.7 | 7.1 | 1.1 | 17.2 | 99.2              |
| 533   | 2200                        | 1       | 92.9             | 0.2                                               | 5.6 | 14.1 | 8.4  | 9.4  | 1.5  | 14.4 | 0.5     | 12.0 | 0.4     | 7.5 | 2.3           | 0.3   | 1.1 | 2.6 | 7.4 | 1.1 | 11.2 | 98.5              |
| 533   | 8800                        | 1       | 38.6             | 0.2                                               | 4.1 | 36.1 | 14.3 | 5.3  | 1.6  | 8.4  | 0.6     | 8.1  | 0.2     | 5.3 | 1.4           | 0.3   | 0.5 | 2.4 | 4.4 | 1.2 | 5.6  | 101.2             |
| 533   | 10000                       | 1       | 33.5             | 0.2                                               | 4.1 | 41.4 | 14.0 | 4.1  | 1.5  | 7.6  | 0.6     | 7.5  | 0.2     | 5.4 | 0.0           | 2.0   | 0.4 | 1.6 | 4.8 | 0.8 | 4.0  | 98.8              |

<sup>a</sup>Products distributions were verified by using the gaseous effluent chemicals at the reaction conditions of T = 573–513 K, P = 1–5 bar and GHSV = 4400–10000 L/(kg<sub>cat</sub>·h) with DME/N<sub>2</sub> = 5/95 (mol%), and the abbreviations of m,p,o-X, EMB and TMB stand for m,p,o-Xylene, ethylmethylbenzene and tetramethylbenzene, respectively.

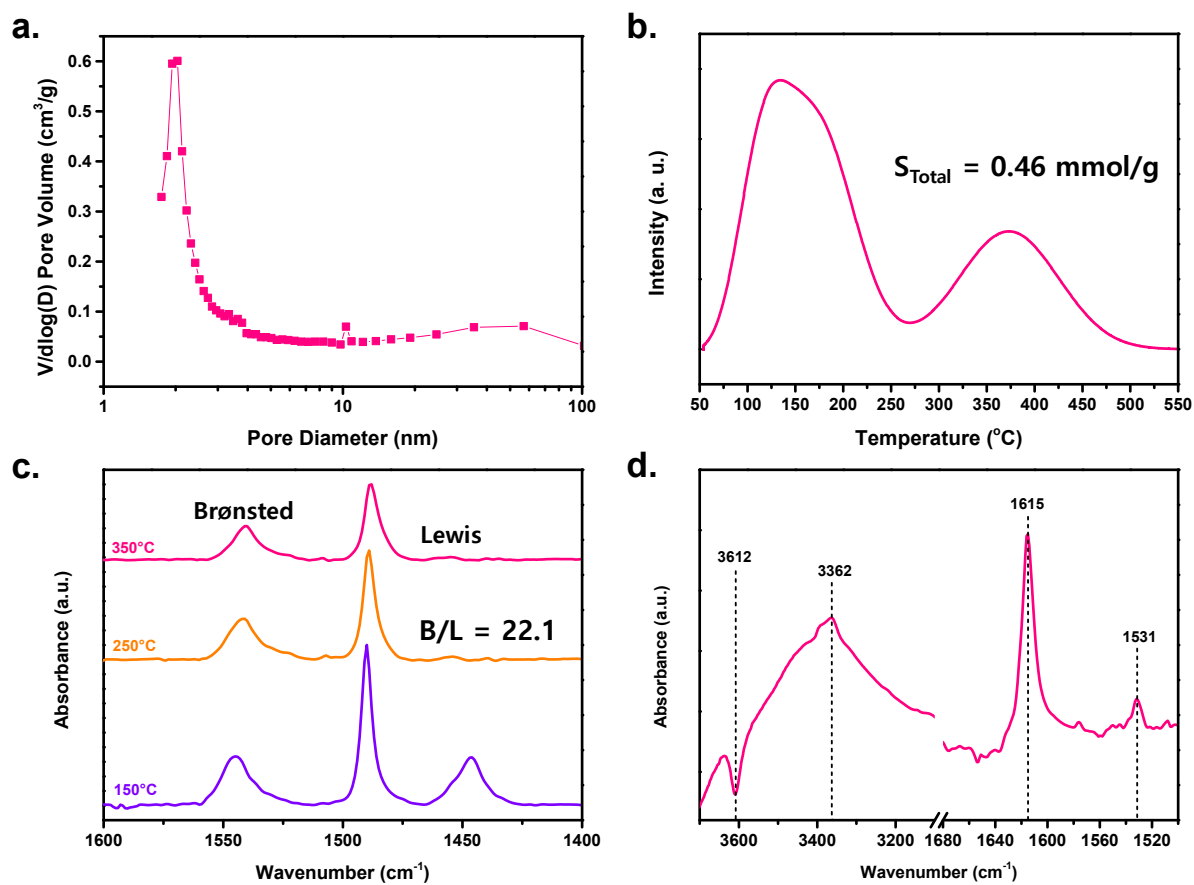

**Figure S1.** Bulk and surface properties of the fresh nano-structured ZSM-5; **(a)** Pore size distribution measured by  $N_2$  adsorption-desorption analysis, **(b)**  $NH_3$  TPD patterns, **(c)** Characteristic Py-IR spectra at three different desorption temperatures of 423, 523, 623 K and **(d)** characteristic DTBPy-IR spectra.

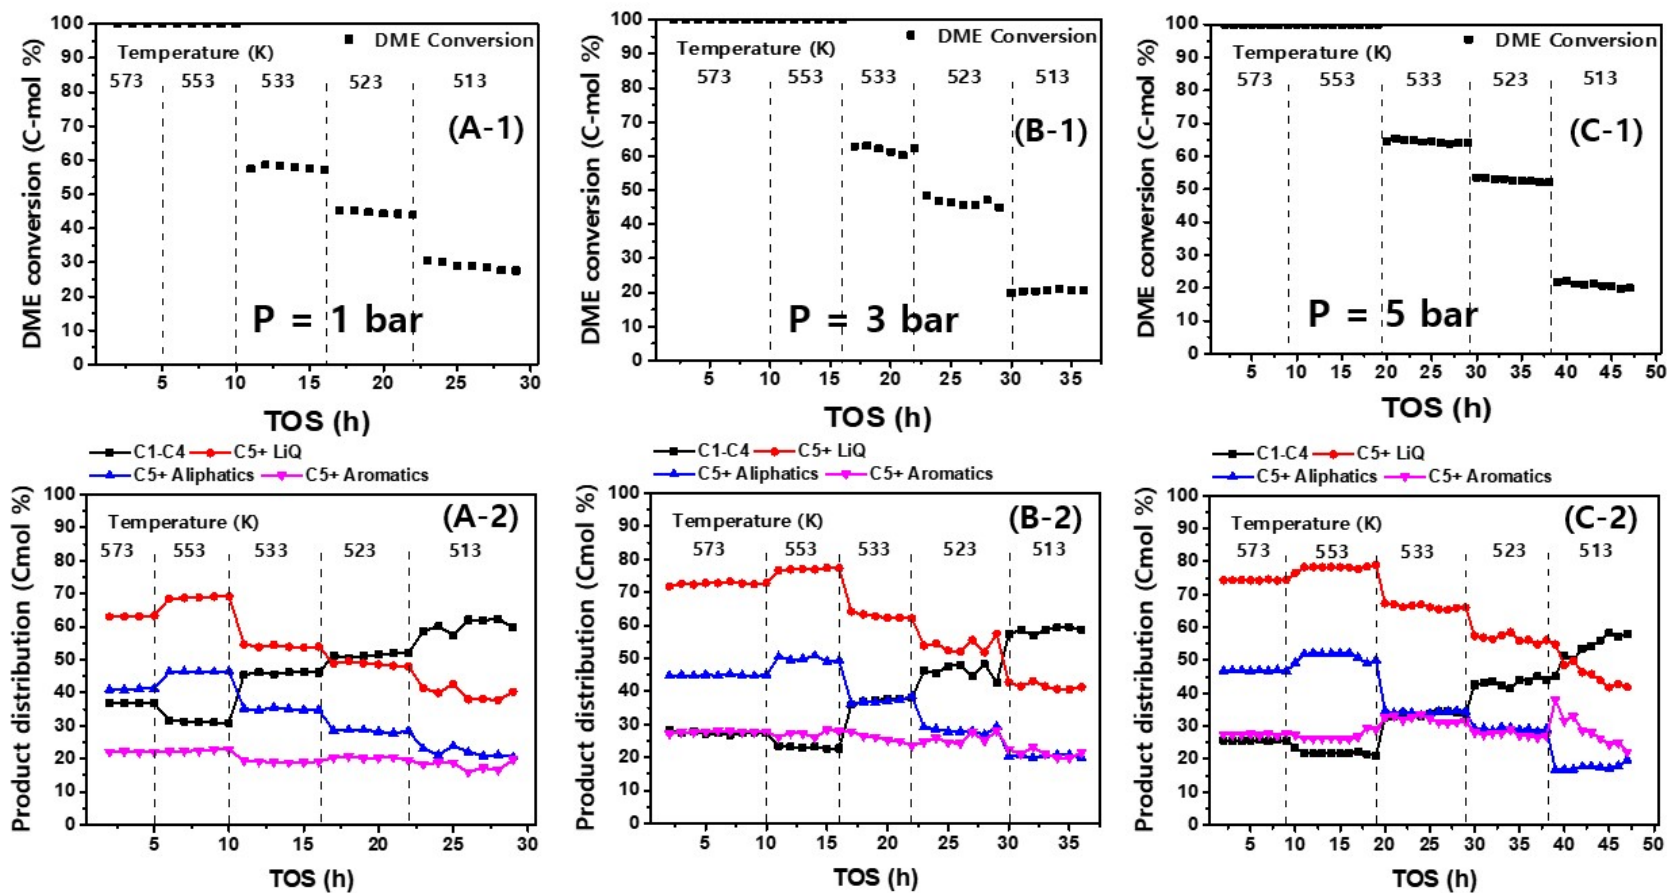

**Figure S2.** Representative reaction results of (1) DME conversion and (2) product distributions of gaseous and liquid products at different temperatures and pressures such as (A) 1 bar, (B) 3 bar, and (C) 5 bar.

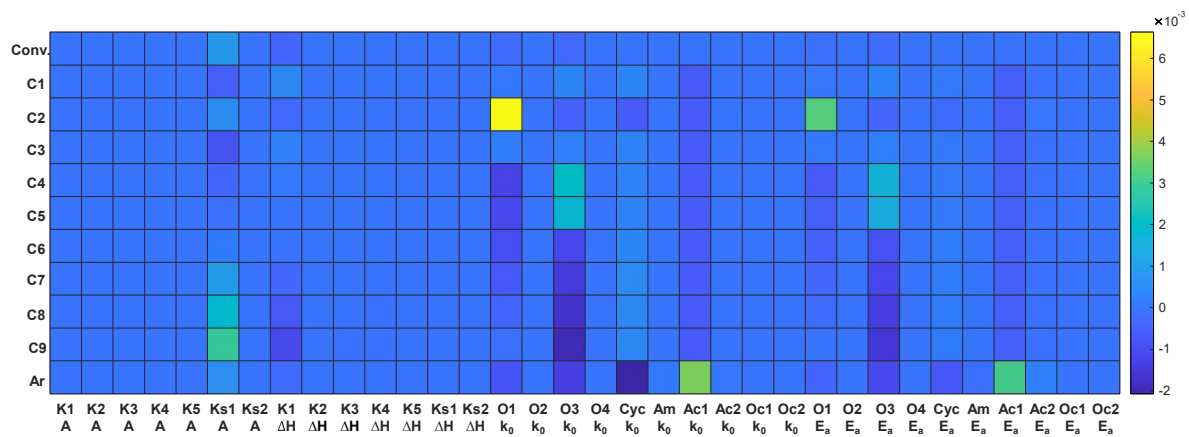

**Figure S3.** Sensitivity analysis of the conversion and product selectivities to the estimated parameters of the model.
